# Supplementary material for: Controlled Synthesis of Au25 Superatom Using a Dendrimer Template
Source: MDPI journal article supplement (doi:10.3390/molecules27113398), 2022-05-25
Supplement: s1 [file s1]

# Controlled synthesis of Au<sub>25</sub> superatom using a dendrimer template

Hisanori Muramatsu <sup>1</sup>, Tetsuya Kambe <sup>1,2</sup>, Takamasa Tsukamoto <sup>1,2,3</sup>, Takane Imaoka <sup>1,2</sup> and Kimihisa Yamamoto <sup>1,2,\*</sup>

<sup>1</sup> Laboratory of Chemistry and Life Science (CLS), Tokyo Institute of Technology, Yokohama 226-8503, Japan; muramatsu.h.ae@m.titech.ac.jp (H.M.); kambe.ta@m.titech.ac.jp (T.K.); tsukamoto.t.ad@m.titech.ac.jp (T.T.); timaoka@res.titech.ac.jp (T.I.); yamamoto.k.at@m.titech.ac.jp (K.Y.)

<sup>2</sup> JST-ERATO, Yamamoto Atom Hybrid Project, Tokyo Institute of Technology, Yokohama 226-8503, Japan

<sup>3</sup> JST-PRESTO, Kawaguchi, Saitama, 332-0012, Japan

\* Correspondence: yamamoto.k.at@m.titech.ac.jp (K.Y.); Tel.: +81-45-924-5260 (K.Y.)

## Supporting Figure List

**Figure S1.** Schematic diagram of the structure and coordination of the dendrimer (TPM G4) used in this study.

**Figure S2.** (a) Coordination image of AuCl<sub>3</sub> to TPMG4, (b) UV-Vis absorption spectra obtained by tightening of AuCl<sub>3</sub> vs. TPMG4, (c) magnified view of UV-Vis absorption spectrum near the isoabsorption point and (d) the change in absorbance at 287 nm.

**Figure S3.** (a) STEM image, (b) STEM/EDS mapping image and (c,d) EDS spectrum (yellow: whole image, gray: blank area) of Au<sub>25</sub>PET<sub>18</sub>

**Figure S4.** XPS spectrum of Au<sub>25</sub>PET<sub>18</sub> and Au wire. X-ray source is monochrome Al K $\alpha$  (1486.7 eV). Neutralizer's emission current is 1  $\mu$ A.

**Figure S5.** MALDI-TOF-MS spectra after 2 hours of the Au<sub>25</sub>PET<sub>18</sub> synthesis reaction with TPM G4.

**Figure S6.** Synthetic procedure of Au<sub>25</sub>PET<sub>18</sub> cluster not using TPM G4. Note: main products is Au nanoparticle. The concentration of AuCl<sub>3</sub> was the same as when synthesized using TPM G4. In the presence of dendrimers, the equivalent of 25 equivalents of AuCl<sub>3</sub> is 45  $\mu$ M.

**Figure S7.** MALDI-TOF-MS spectra after 2 hours of the Au<sub>25</sub>PET<sub>18</sub> synthesis reaction without TPM G4.

**Figure S8.** Comparison during synthesis of Au<sub>25</sub>PET<sub>18</sub> with and without TPM G4. A significant color change is observed immediately after reduction.

**Figure S9.** Image of the effect of dendrimer during Au<sub>25</sub>PET<sub>18</sub> synthesis and its main and byproducts.

**Figure S10.** The image of the stable structures of PdAu<sub>24</sub>PET<sub>18</sub> (note: draw a figure with reference to the previous report [76]).

**Figure S11.** (a) STEM image, (b) STEM/EDS mapping image and (c) EDS spectrum (purple: whole image, gray: blank area) of PdAu<sub>24</sub>PET<sub>18</sub>.

**Figure S12.** (a) Synthetic scheme of thiol-protected Au clusters blended with different elements (Pt), (b) the image of the possible structures of PtAu<sub>24</sub>PET<sub>18</sub> (note: draw a figure with reference to the previous report [20]), (c) MS spectrum of PtAu<sub>24</sub>SR<sub>18</sub>.

**Figure S13.** (a) STEM image, (b) STEM/EDS mapping image and (c,d) EDS spectrum (light blue: whole image, gray: blank area) of PtAu<sub>24</sub>PET<sub>18</sub>.

**Figure S14.** A comparison of the simulated values (light blue: PtAu<sub>24</sub>PET<sub>18</sub> and yellow: Au<sub>25</sub>PET<sub>18</sub>) and the measured value of PtAu<sub>24</sub>PET<sub>18</sub> (red).

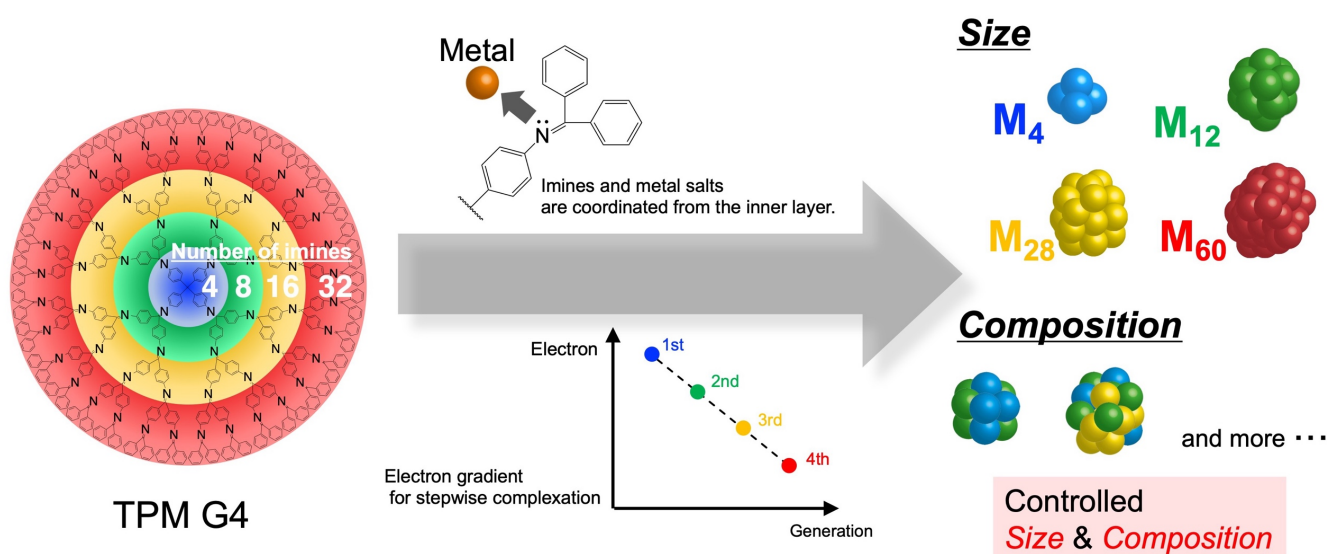

**Figure S1.** Schematic diagram of the structure and coordination of the dendrimer (TPM G4) used in this study.

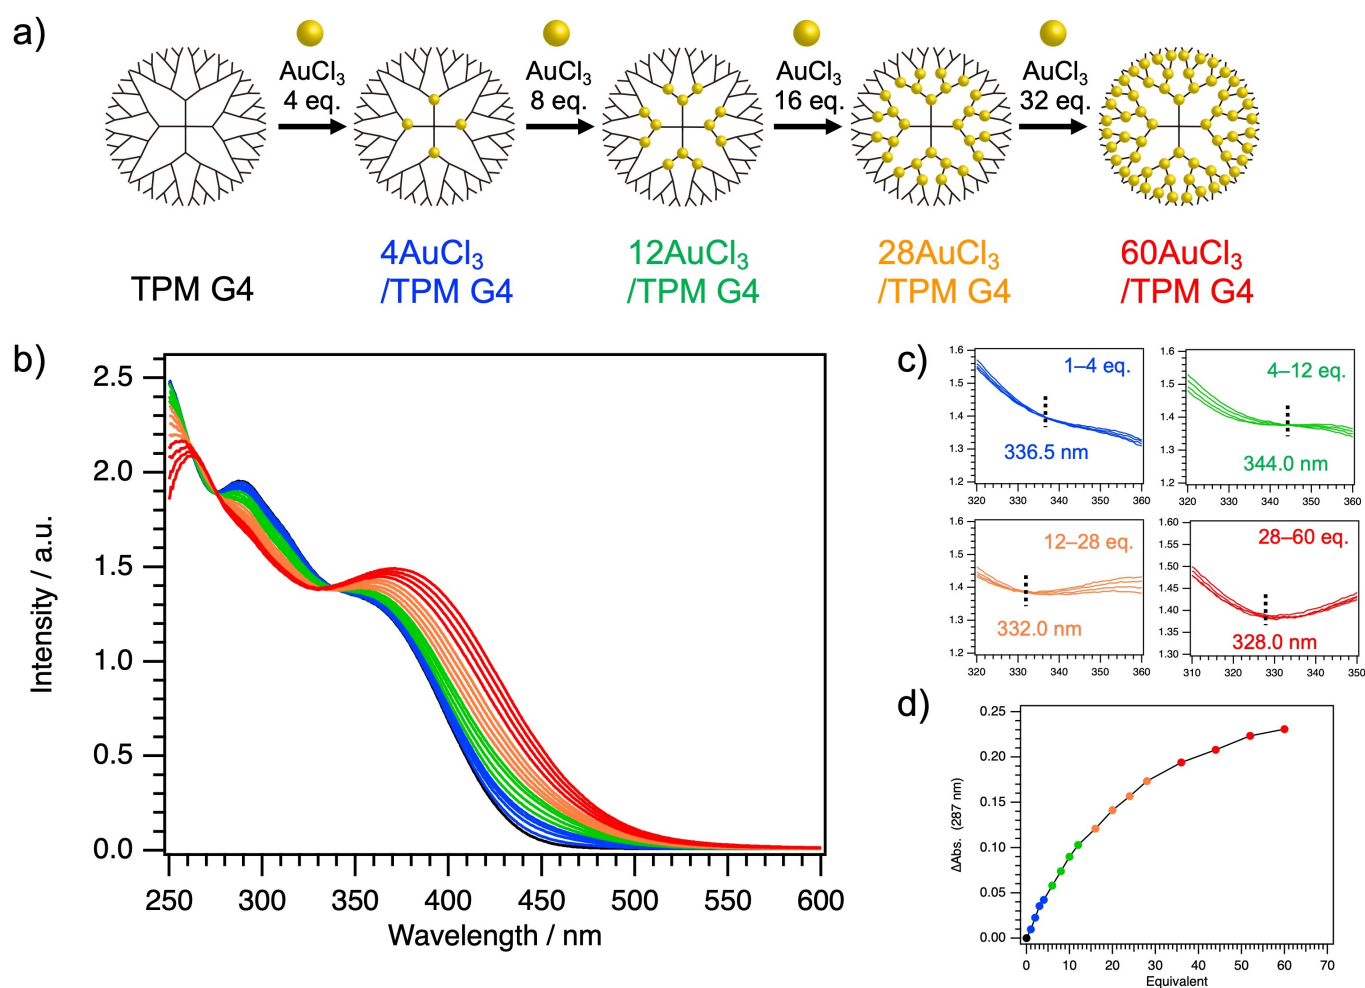

**Figure S2.** (a) Coordination image of  $\text{AuCl}_3$  to TPMG4, (b) UV-Vis absorption spectra obtained by tightening of  $\text{AuCl}_3$  vs. TPMG4, (c) magnified view of UV-Vis absorption spectrum near the isoabsorption point and (d) the change in absorbance at 287 nm.

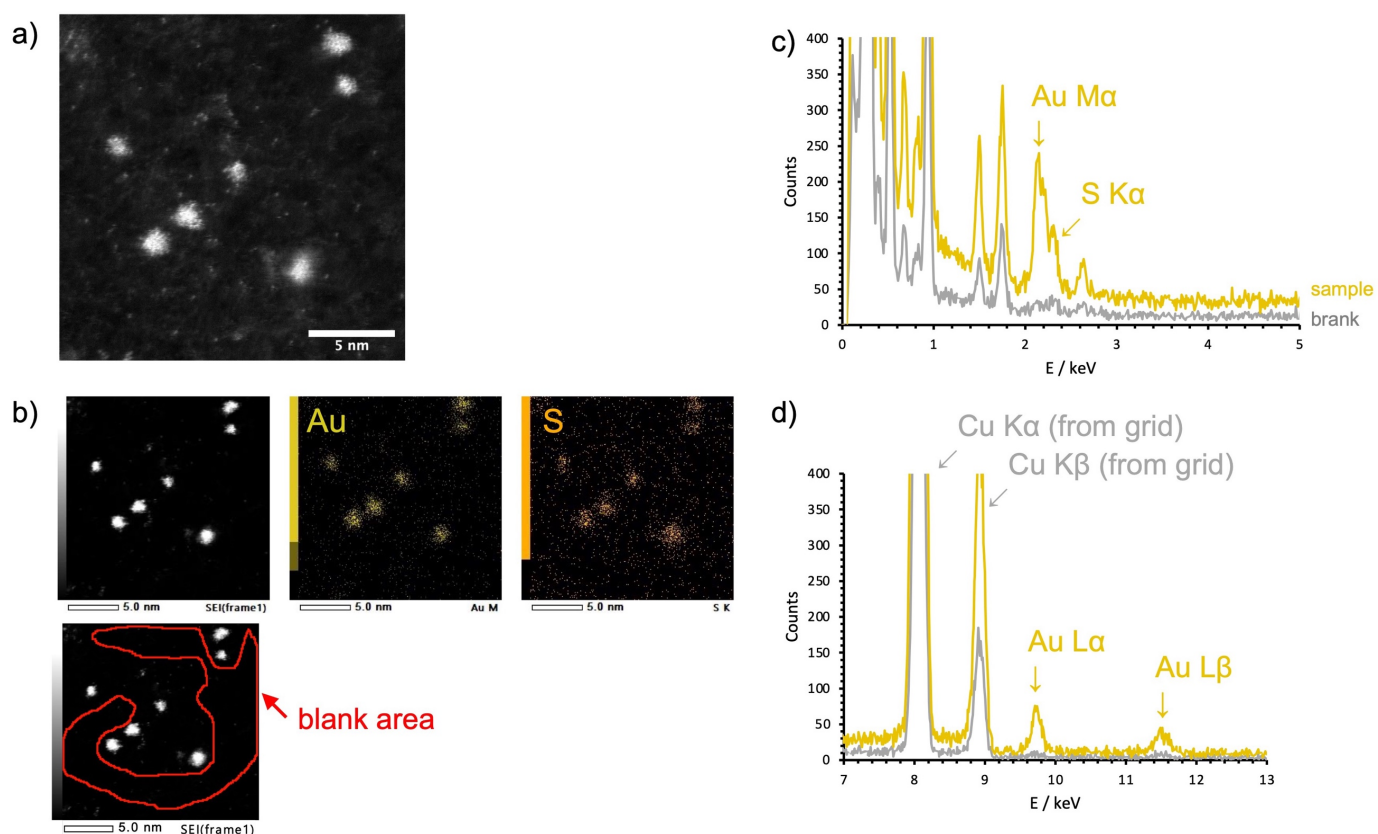

**Figure S3.** (a) STEM image, (b) STEM/EDS mapping image and (c,d) EDS spectrum (yellow: whole image, gray: blank area) of Au<sub>25</sub>PET<sub>18</sub>

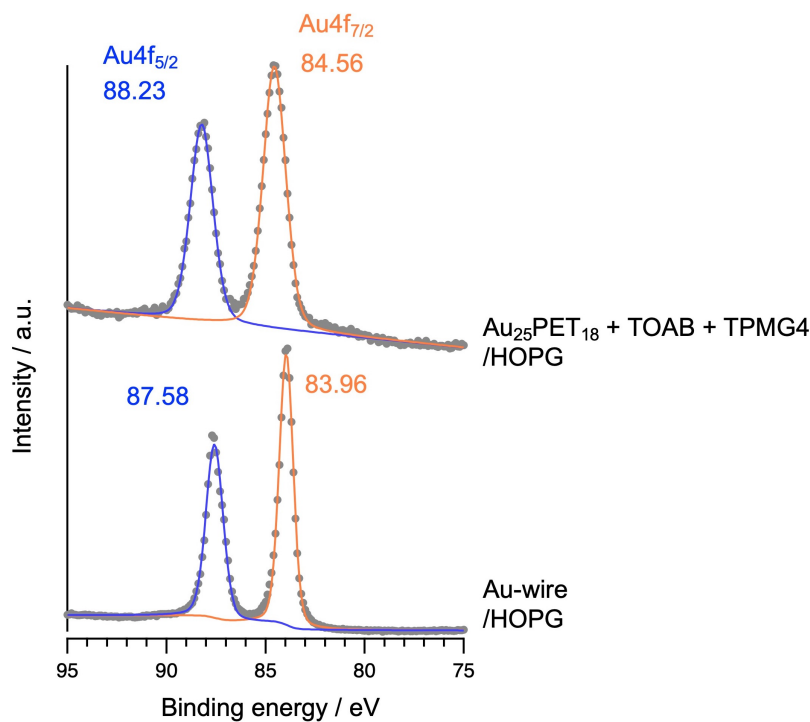

**Figure S4.** XPS spectrum of Au<sub>25</sub>PET<sub>18</sub> and Au wire. X-ray source is monochrome Al K $\alpha$  (1486.7 eV). Neutralizer's emission current is 1  $\mu$ A.

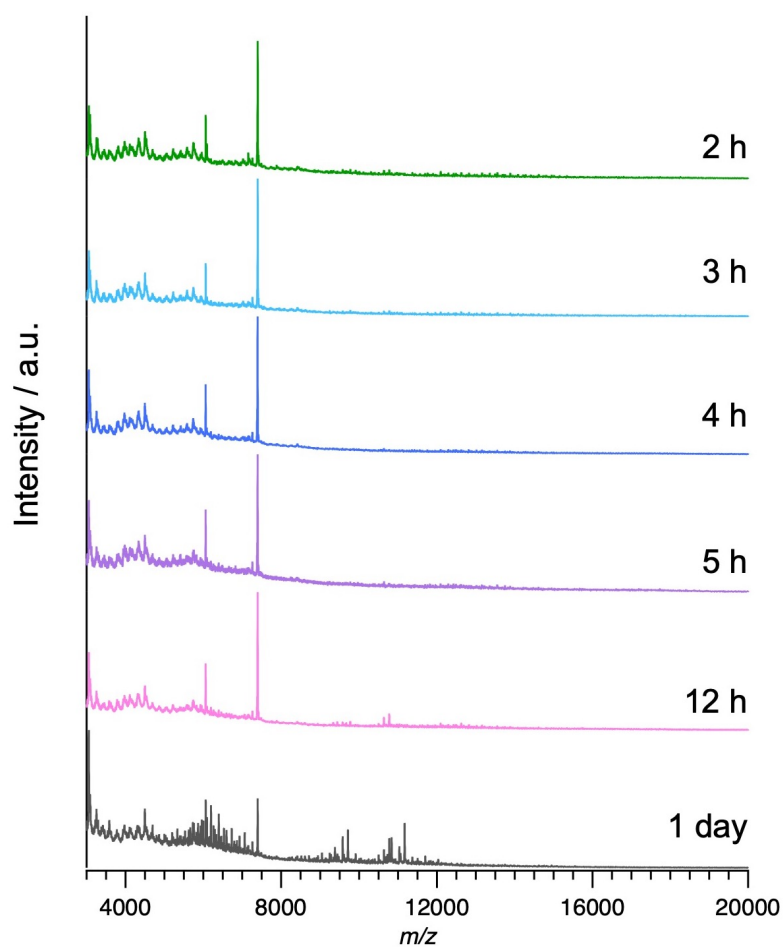

**Figure S5.** MALDI-TOF-MS spectra after 2 hours of the  $\text{Au}_{25}\text{PET}_{18}$  synthesis reaction with TPM G4.

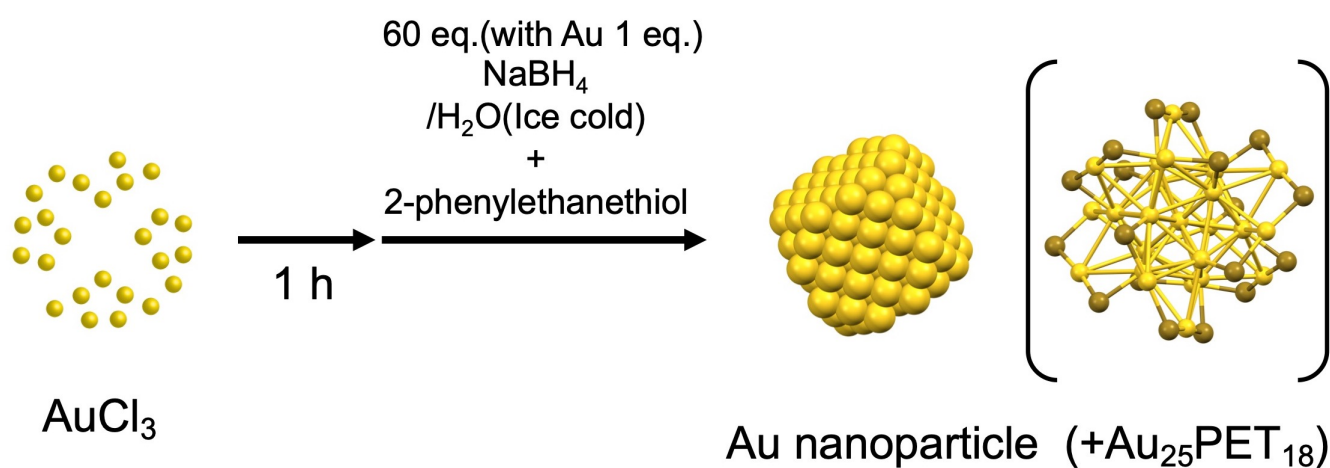

**Figure S6.** Synthetic procedure of  $\text{Au}_{25}\text{PET}_{18}$  cluster not using TPM G4. Note: main products is Au nanoparticle. The concentration of  $\text{AuCl}_3$  was the same as when synthesized using TPM G4. In the presence of dendrimers, the equivalent of 25 equivalents of  $\text{AuCl}_3$  is  $45\text{ }\mu\text{M}$ .

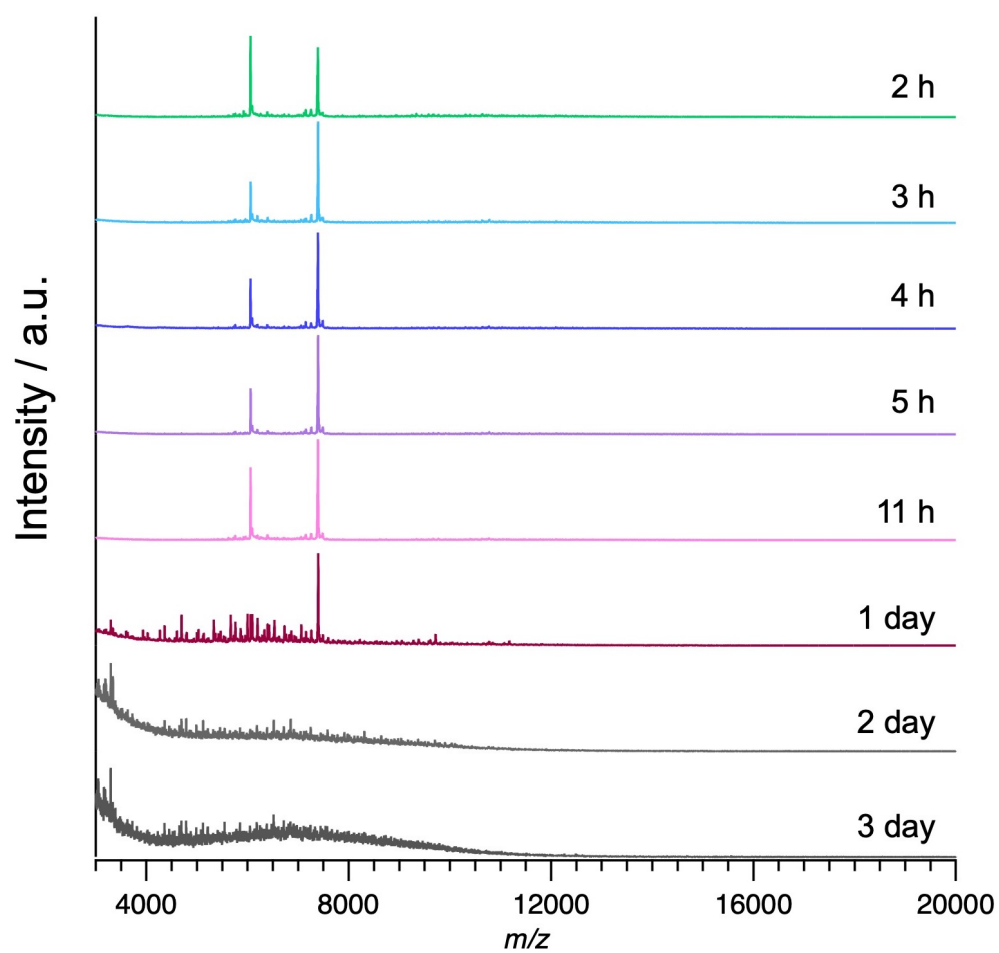

**Figure S7.** MALDI-TOF-MS spectra after 2 hours of the Au<sub>25</sub>PET<sub>18</sub> synthesis reaction without TPM G4.



**Au<sub>25</sub>PET<sub>18</sub> with TPM G4**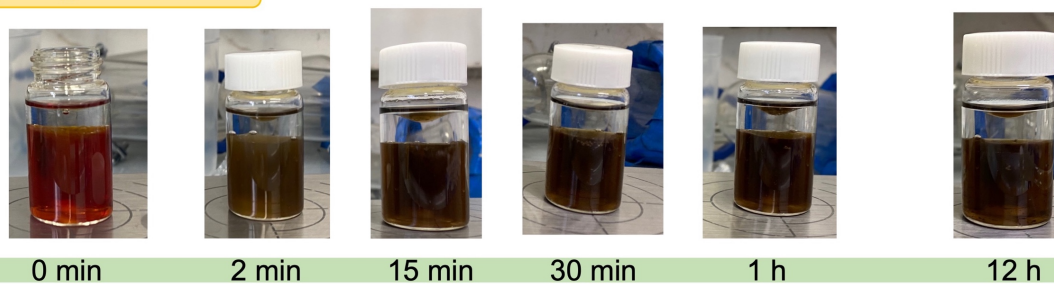**Au<sub>25</sub>PET<sub>18</sub> not TPM G4**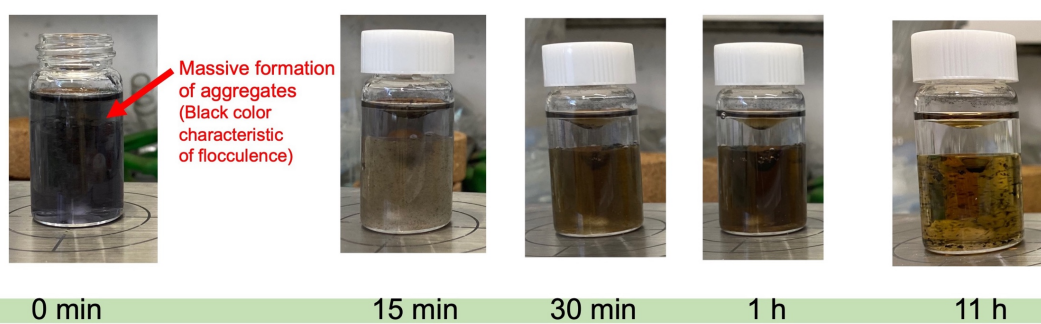

**Figure S8.** Comparison during synthesis of Au<sub>25</sub>PET<sub>18</sub> with and without TPM G4. A significant color change is observed immediately after reduction.

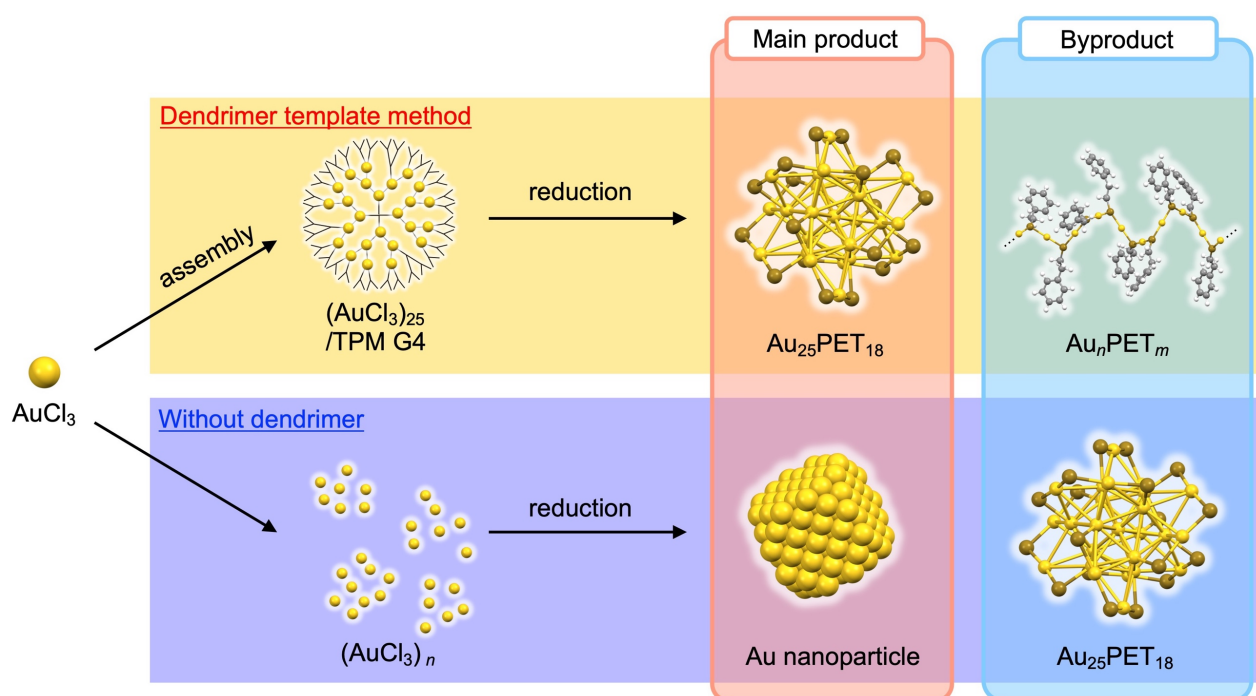

**Figure S9.** Image of the effect of dendrimer during Au<sub>25</sub>PET<sub>18</sub> synthesis and its main and byproducts.

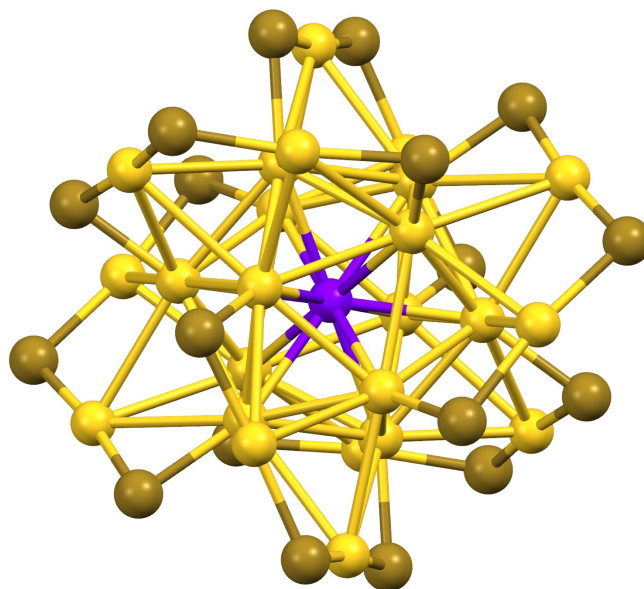

**Figure S10.** The image of the stable structures of PdAu<sub>24</sub>PET<sub>18</sub> (note: draw a figure with reference to the previous report [76]).

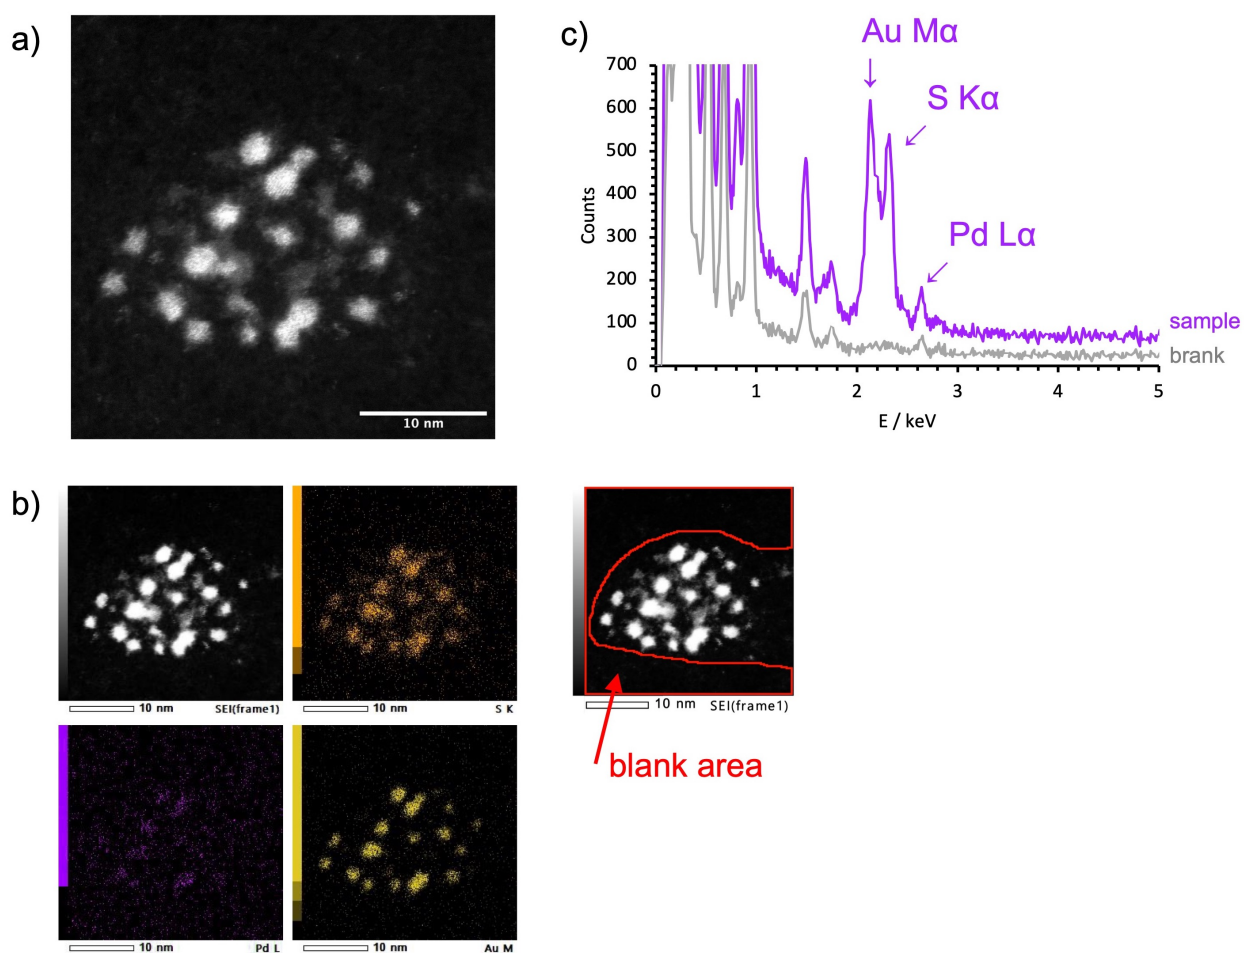

**Figure S11.** (a) STEM image, (b) STEM/EDS mapping image and (c) EDS spectrum (purple: whole image, gray: blank area) of PdAu<sub>24</sub>PET<sub>18</sub>.

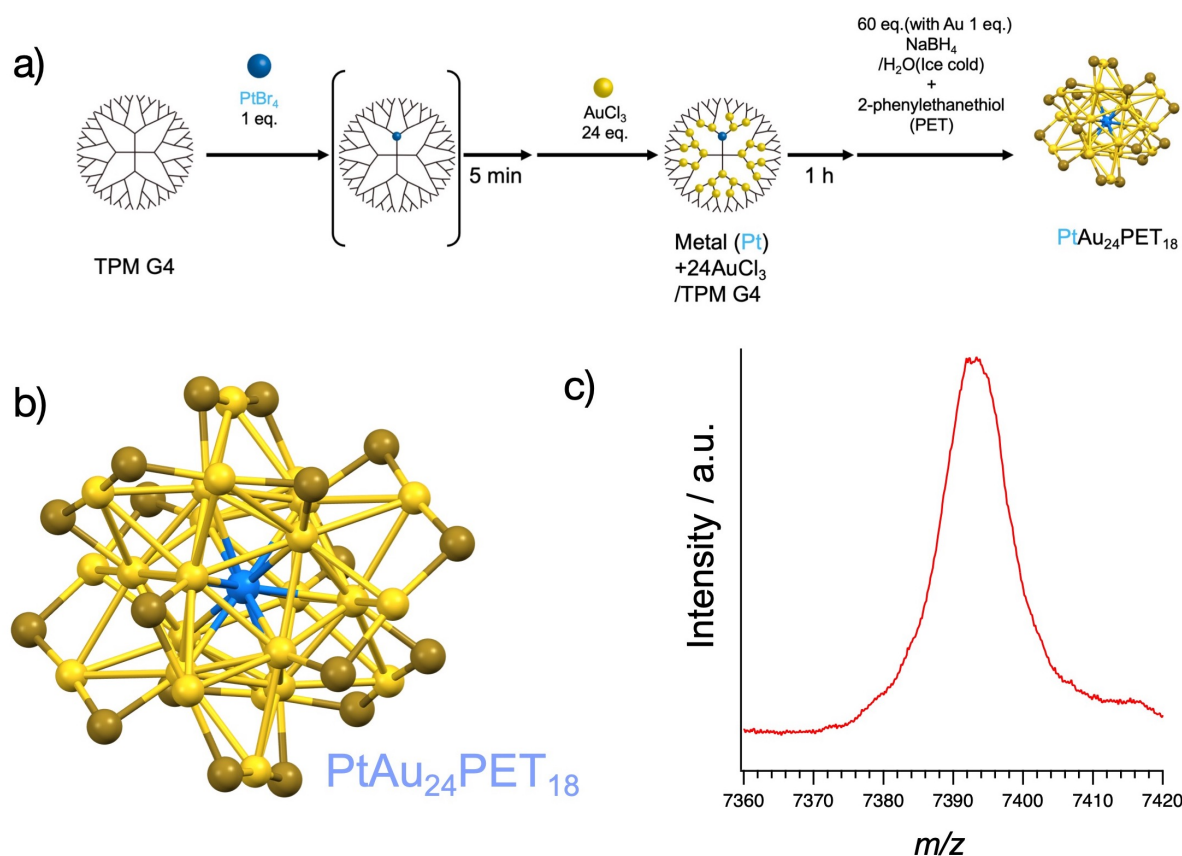

**Figure S12.** (a) Synthetic scheme of thiol-protected Au clusters blended with different elements (Pt), (b) the image of the possible structures of PtAu<sub>24</sub>PET<sub>18</sub> (note: draw a figure with reference to the previous report [20].), (c) MS spectrum of PtAu<sub>24</sub>SR<sub>18</sub>.

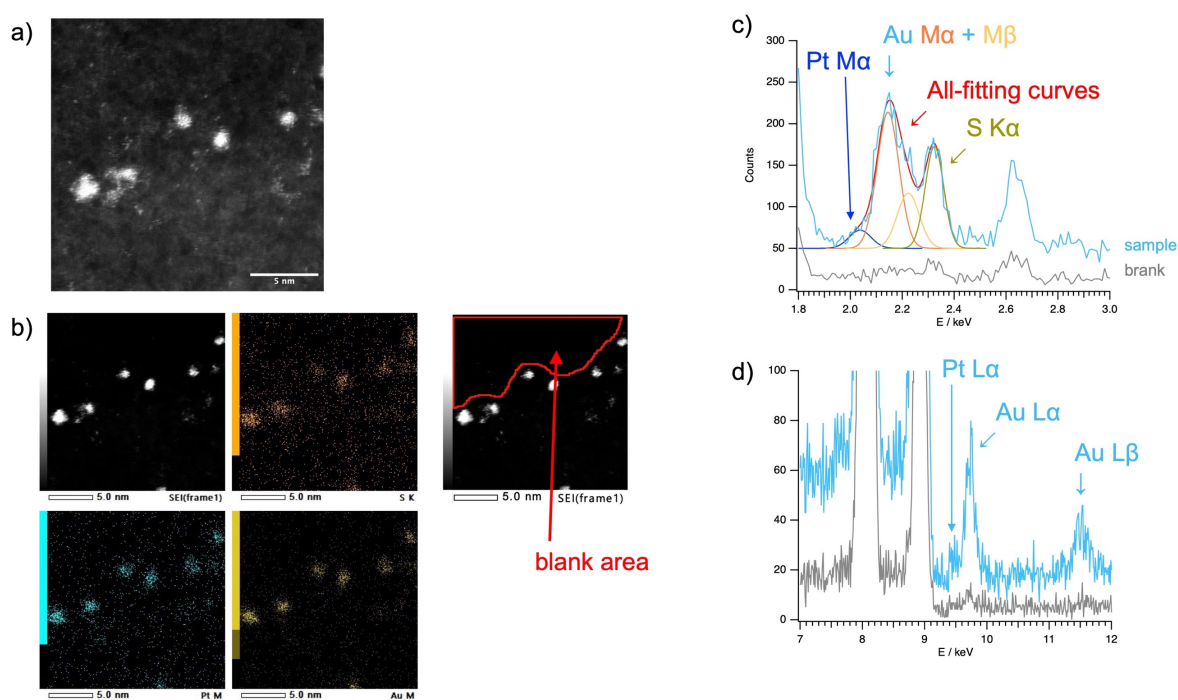

**Figure S13.** (a) STEM image, (b) STEM/EDS mapping image and (c,d) EDS spectrum (light blue: whole image, gray: blank area) of PtAu<sub>24</sub>PET<sub>18</sub>.



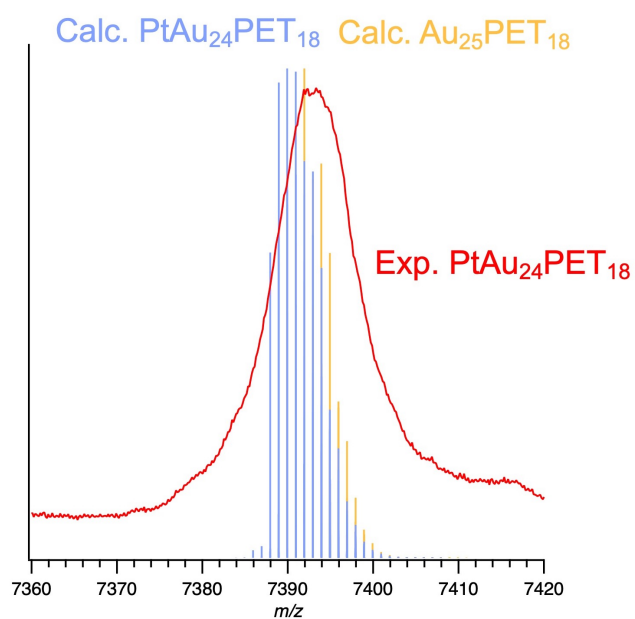

**Figure S14.** A comparison of the simulated values (light blue: PtAu<sub>24</sub>PET<sub>18</sub> and yellow: Au<sub>25</sub>PET<sub>18</sub>) and the measured value of PtAu<sub>24</sub>PET<sub>18</sub> (red).
